# Supplementary material
Source: Springer Nature journal article supplement (https://www.springermedizin.de/resource/supplementary/13063_2007_202_MOESM2_ESM.pdf/9622284)
Supplement: MOESM2 [file 9622284]

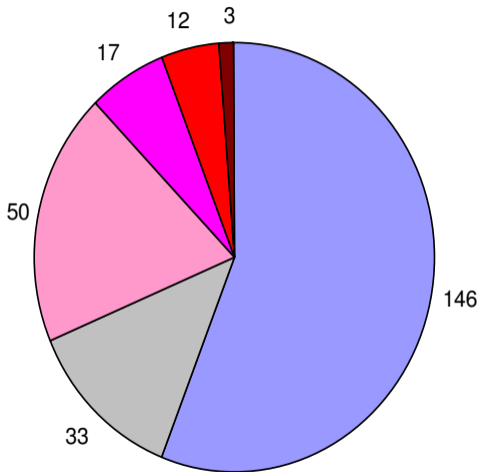

■ No delayed disclosure 56%

■ Undecided 13%

■ Acceptable upon trial completion 19%

■ Acceptable upon regulatory approval 7%

■ Acceptable during the trial 5%

■ Acceptable when commercial products is first marketed 1%
